# Supplementary material for: Epigenetic-Mediated Antimicrobial Resistance: Host versus Pathogen Epigenetic Alterations
Source: MDPI journal article supplement (doi:10.3390/antibiotics11060809), 2022-06-16
Supplement: s1 [file s1]

**Supplementary Table S1:** Epigenetic mechanisms and the related articles reviewed in this study.

|                        | <b>Epigenetic mechanism(s)</b> | <b>References</b>      |
|------------------------|--------------------------------|------------------------|
| Bacterial epigenetics  | DNA methylation                | [20-31, 50-58, 63, 64] |
|                        | RNA modification               | [32-34]                |
|                        | Histone-like proteins          | [35-37, 39-48, 108]    |
|                        | Plasmid-mediated epigenetics   | [59-62]                |
| Human host epigenetics | DNA methylation                | [65, 67-73, 77-81]     |
|                        | Histone modification           | [82-88]                |
|                        | ncRNA-mediated modifications   | [89-92, 95]            |
| Epidrugs               | DNA methylation                | [97-101]               |
|                        | Histone modification           | [82, 95, 102-105]      |
|                        | RNA modification               | [106, 107]             |
